# Supplementary material
Source: Springer Nature journal article supplement (https://www.springermedizin.de/resource/supplementary/13058_2013_3261_MOESM3_ESM.pdf/9703714)

**A**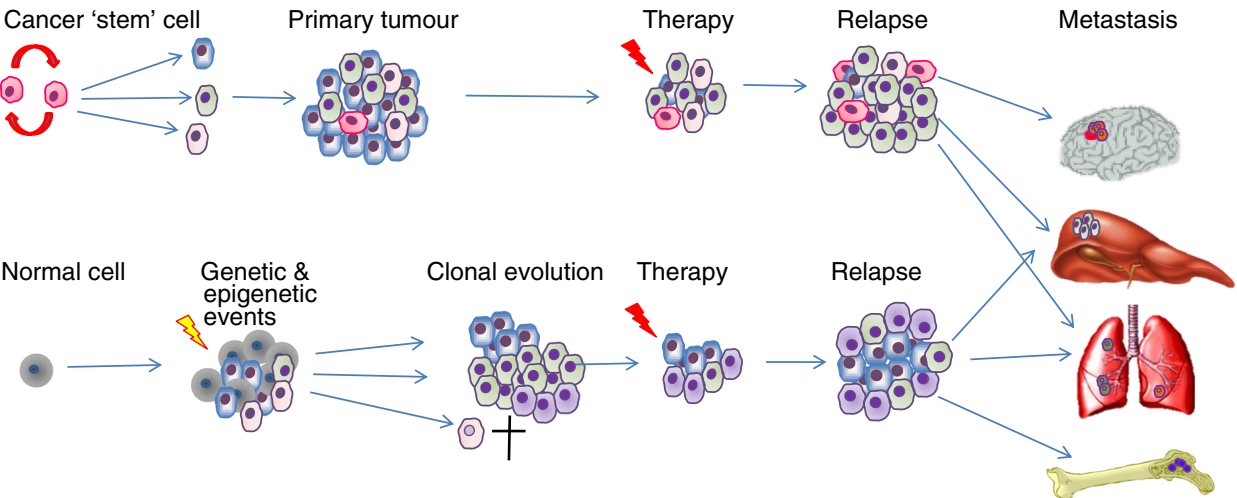**B**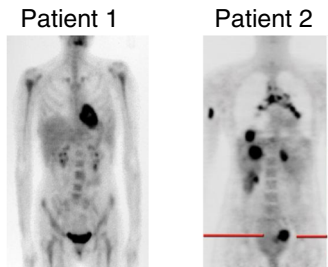

Supplement: MOESM3 [file 9703714]
